# Supplementary material for: A control framework to optimize public health policies in the course of the COVID-19 pandemic
Source: Springer Nature journal article supplement (doi:10.1038/s41598-021-92636-8), 2021-06-28
Supplement: MOESM1 [file 41598_2021_92636_MOESM1_ESM.pdf]

# A control framework to optimize public health policies in the course of the COVID-19 pandemic

Igor M L Pataro<sup>1,†\*</sup>, Juliane F Oliveira<sup>2,3,†\*</sup>, Marcelo M Morato<sup>4</sup>, Alan A S Amad<sup>5</sup>,  
Pablo I P Ramos<sup>2</sup>, Felipe A C Pereira<sup>6</sup>, Mateus S Silva<sup>7</sup>, Daniel C P Jorge<sup>7</sup>,  
Roberto F S Andrade<sup>2,7,\*\*</sup>, Maurício L Barreto<sup>2,8,\*\*</sup>, Marcus Americano da Costa<sup>9,\*\*</sup>

<sup>1</sup>Department of Informatics, University of Almería, Almería, Spain

<sup>2</sup>Center for Data and Knowledge Integration for Health (CIDACS), Gonçalo Moniz Institute,  
Oswaldo Cruz Foundation (FIOCRUZ), Salvador, Bahia, Brazil

<sup>3</sup>Center of Mathematics of the University of Porto (CMUP), Department of Mathematics, Porto, Portugal

<sup>4</sup>Department of Automation and Systems, Federal University of Santa Catarina, Florianópolis, Brazil

<sup>5</sup>College of Engineering, Swansea University, Swansea, Wales, United Kingdom

<sup>6</sup>Institute of Physics, University of São Paulo, São Paulo, Brazil

<sup>7</sup>Institute of Physics, Federal University of Bahia, Salvador, Bahia, Brazil

<sup>8</sup>Institute of Collective Health, Federal University of Bahia, Salvador, Bahia, Brazil

<sup>9</sup> Department of Chemical Engineering, Federal University of Bahia, Salvador, Bahia, Brazil

†Correspondence: Igor ML Pataro (ilp428@inlumine.ual.es) and  
Juliane F Oliveira (julianlanzin@gmail.com).

\*These authors contributed equally to this work.

\*\*These authors contributed equally to this work.

June 2, 2021

## Abstract

In this document we present the relevant Supplementary Materials accompanying the manuscript “A control framework to optimize social distancing measures in the course of the COVID-19 pandemic” by Pataro, Oliveira *et al.*

## **Supplementary Figures**

**Bahia** state code (ibge): 29

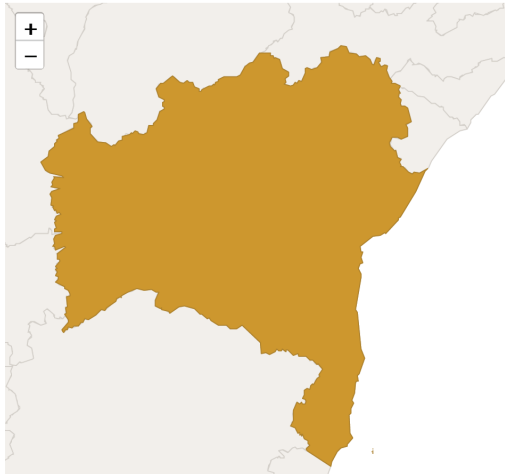

|                                          |                                            |
|------------------------------------------|--------------------------------------------|
| <b>Capital</b>                           | Salvador [2010]                            |
| <b>Territorial Extension</b>             | 564,760.427 km <sup>2</sup> [2019]         |
| <b>Estimated population</b>              | 14,930,634 people [2020]                   |
| <b>Demographic density</b>               | 24.82 inhabitants/km <sup>2</sup> [2010] ▼ |
| <b>Elementary school enrollments</b>     | 2,034,711 enrolled [2018] ▼                |
| <b>IDH</b> Human Development Index - HDI | 0.660 [2010] ▼                             |
| <b>Monthly per capita house income</b>   | 173.47US\$ [2019] ▼                        |
| <b>Number of vehicles</b>                | 4,139,107 vehicles [2018] ▼                |

**Supplementary Figure 1. A factsheet of Bahia, Brazil, with the main economic and social indicators.** Extracted from the Brazilian Institute of Geography and Statistics (IBGE). The exchange rate used to convert Brazilian reais (BRL) to US dollars (USD) was 1 BRL = 0.19 USD (as of Dec 29, 2020).

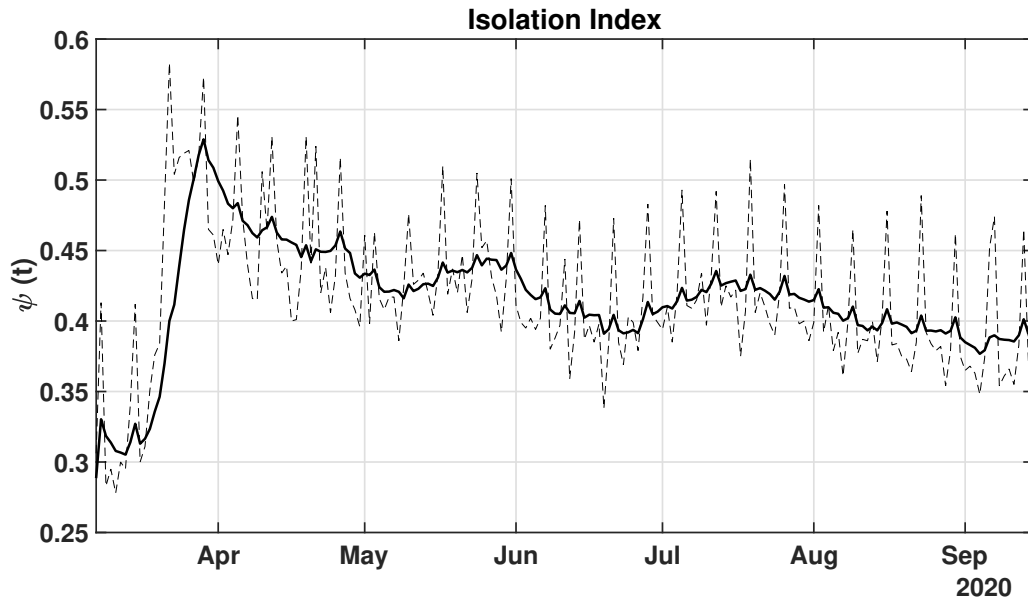

**Supplementary Figure 2. Social mobility reduction index.** The dashed lines represent the daily percentage of social mobility given by InLoco. The full black line is the moving average mean of 8 days.

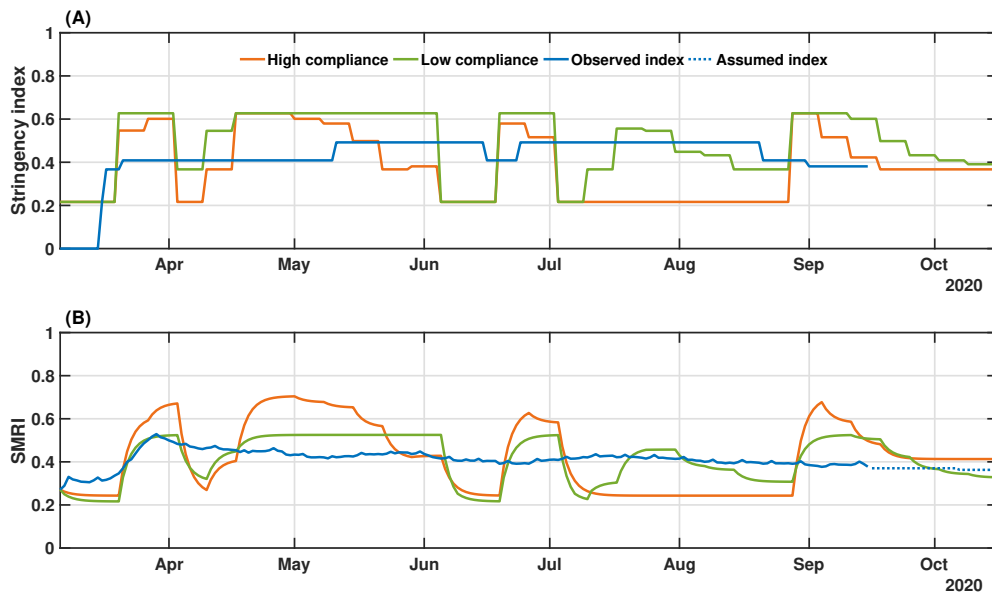

**Supplementary Figure 3. Real and simulated social mobility and governmental interventions in the state of Bahia.** Levels of stringency (A) and social mobility reduction (B) indexes are shown for the high and low compliance scenarios, as well as the actual value of these metrics in the state-level during the period. The observed SMRI values (March 6-September 15) consist of a 8-day moving average. The dotted line in panel (B) indicates the assumed values of SMRI as described in Results. This scenario represents a hypothetical situation in which the government would have applied 21 decrees with stringency index varying between 0.216 to 0.6269, as described in Table S4.

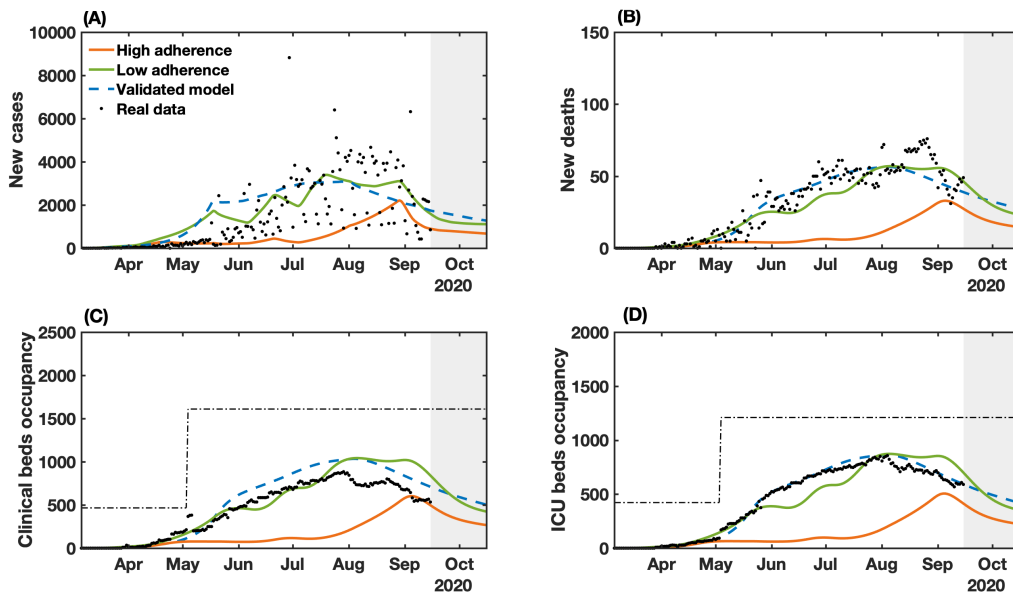

**Supplementary Figure 4. Real and simulation-controlled COVID-19 epidemic unfolding in Bahia, Brazil.** (A) New cases; (B) deaths; (C) clinical hospitalization and (D) ICU bed requirements at the state level. The dashed-blue lines represent the dynamics of the validated model presented in Fig. 2 considering the observed SMRI time series in Fig. 3B. The dashed-dotted lines represent the clinical and ICU bed limits. Raw data (black dots) from March 6 to September 15, 2020 are shown in this graph. This scenario represent a hypothetical situation in which the government would have applied 21 decrees with stringency index varying between 21.62% and 62.69%, as described in Table S4.

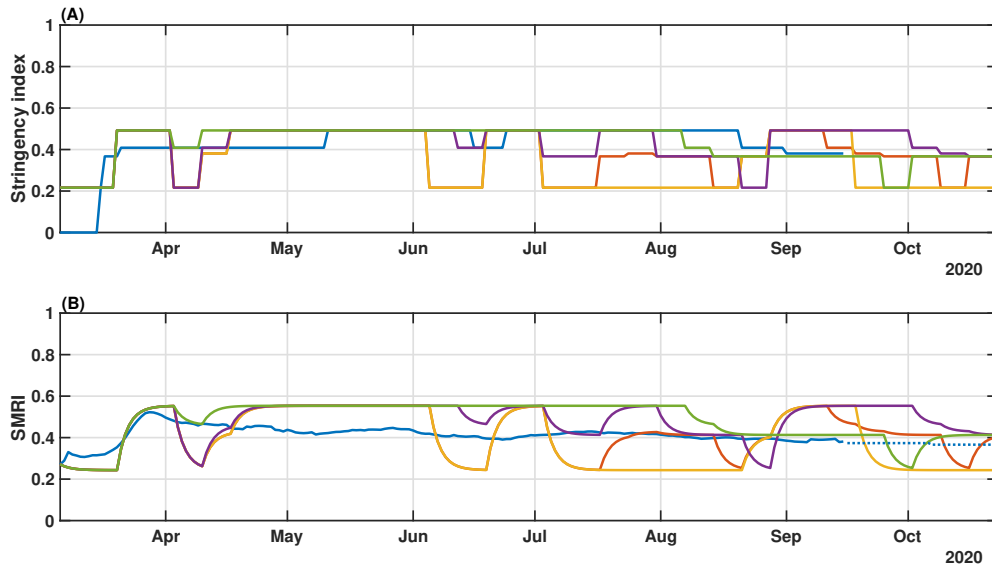

**Supplementary Figure 5. Real and simulated social mobility and governmental interventions in the state of Bahia.** Levels of stringency (A) and social mobility reduction (B) indexes. The blue-solid line represents the real measured index applied in the state from March 16 to September 15. The dotted line in panel (B) indicates the assumed values of SMRI. This scenario simulates different control tuning with the limited variation of the stringency index between 21.62% and 49.21%, changing the parameter  $Q$  to adjust the trade-off between reducing the level of the measures or minimizing the number of cases.  $Q$  was adjusted according to the time windows: i) from March 6 to May 15 ii) from May 16 to August 23 and iii) from August 24 to October 15. For the red line  $Q$  is  $8e4, 3e4, 1e4$ . For the yellow line  $Q$  is  $5e6, 1e6, 2e5$ . For the violet line  $Q$  is  $1e4, 5e3, 1e3$ . For the green line  $Q$  is  $5e3, 1e3, 1e3$ .

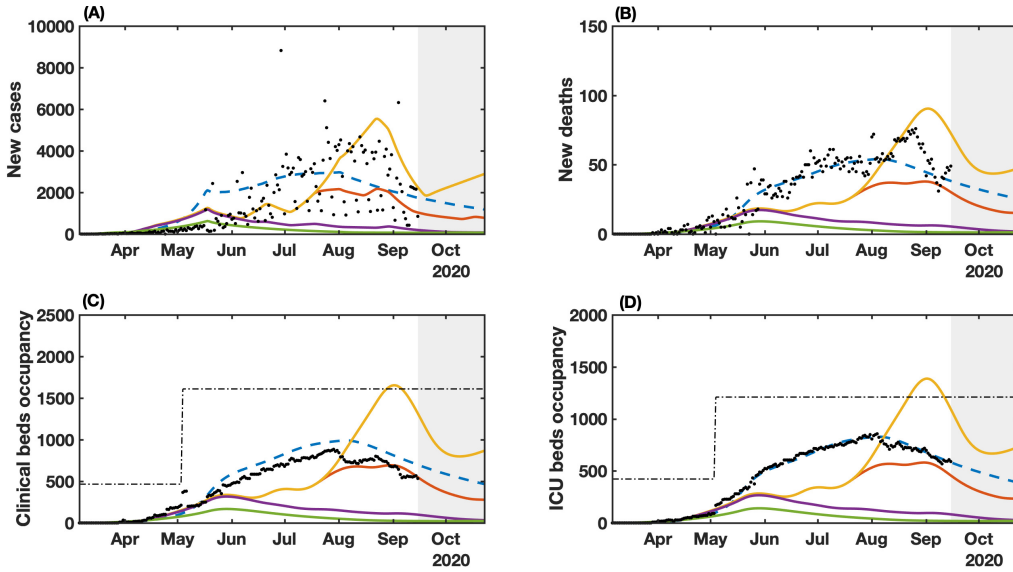

**Supplementary Figure 6. Real and simulation-controlled COVID-19 epidemic behavior in Bahia, Brazil.** (A) New cases; (B) deaths; (C) clinical hospitalization and (D) ICU bed requirements at the state level. The dashed-blue lines represent the dynamics of the validated model presented in Fig. 2 considering the observed SMRI time series in Fig. 3B. The dashed-dotted lines represent the clinical and ICU bed limits. Raw data (black dots) from March 6 to September 15, 2020 are shown in this graph. This scenario simulates different control tuning with the limited variation of the stringency index between 21.62% and 49.21%, changing the parameter  $Q$  to adjust the trade-off between reduce the level of the measures or minimize the number of cases. The  $Q$  was adjusted accordingly to the time windows: i) from March 6 to May 15 ii) from May 16 to August 23 and iii) from August 24 to October 15. For the red line  $Q$  is  $8e4, 3e4, 1e4$ . For the yellow line  $Q$  is  $5e6, 1e6, 2e5$ . For the violet line  $Q$  is  $1e4, 5e3, 1e3$ . For the green line  $Q$  is  $5e3, 1e3, 1e3$ .



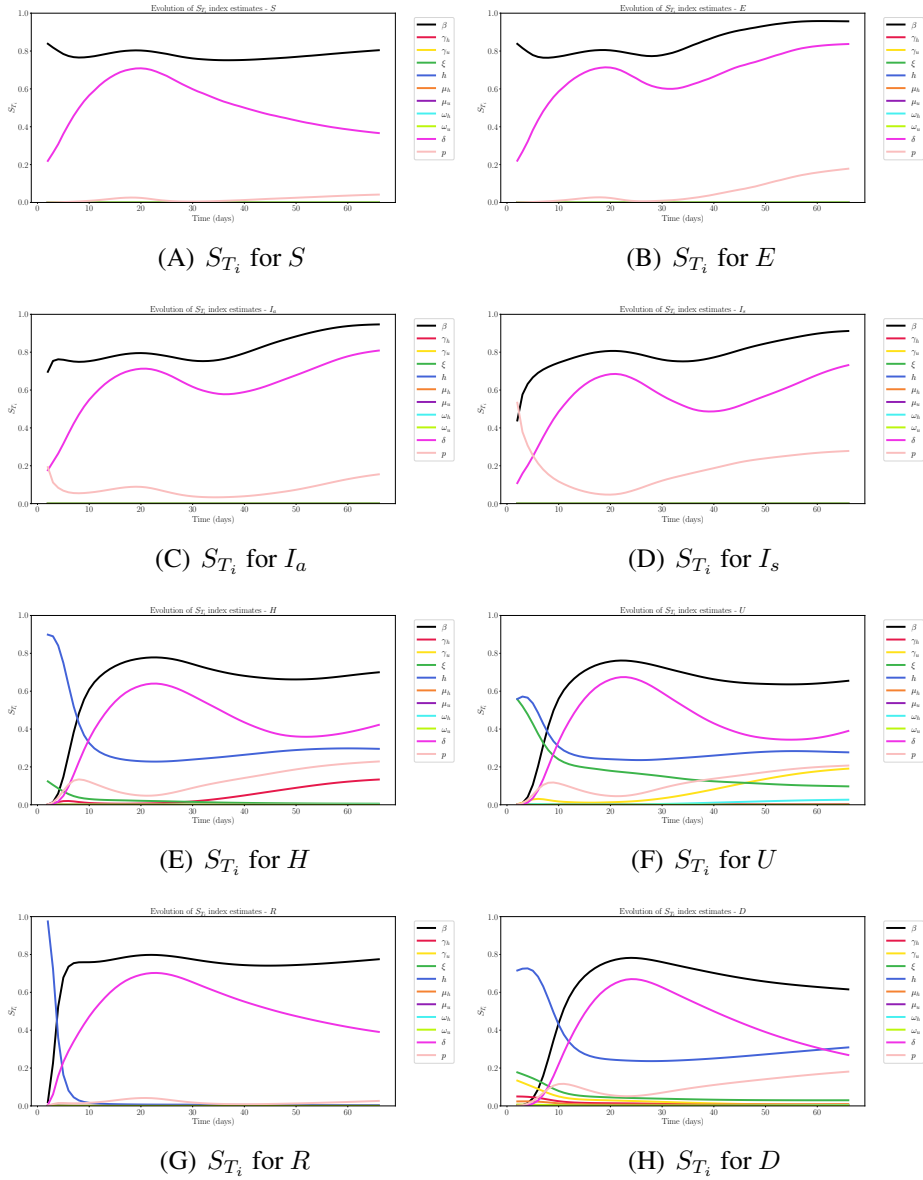

**Supplementary Figure 7.** Sensitivity analysis study for  $S$ ,  $E$ ,  $I_a$ ,  $I_s$ ,  $U$ ,  $H$ ,  $R$  and  $D$  compartments over time. The total effect index  $S_{T_i}$  is shown for each evaluated parameter in each compartment of the SEIIHURD model.

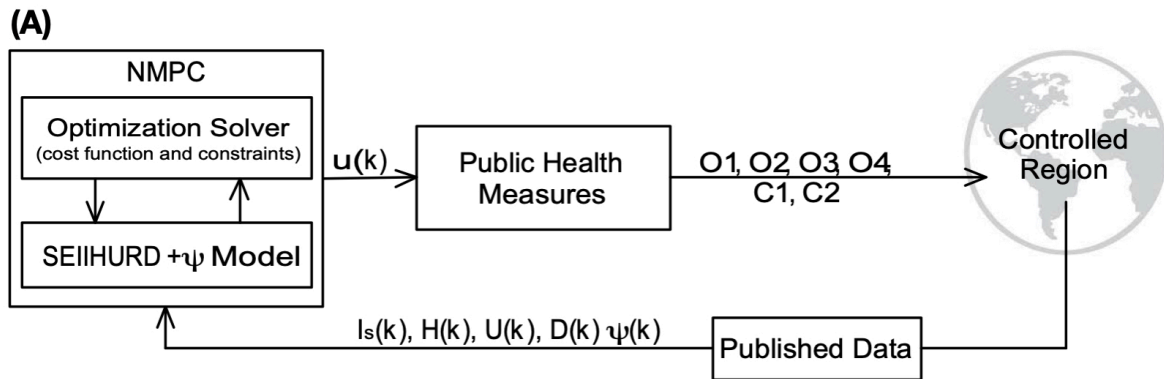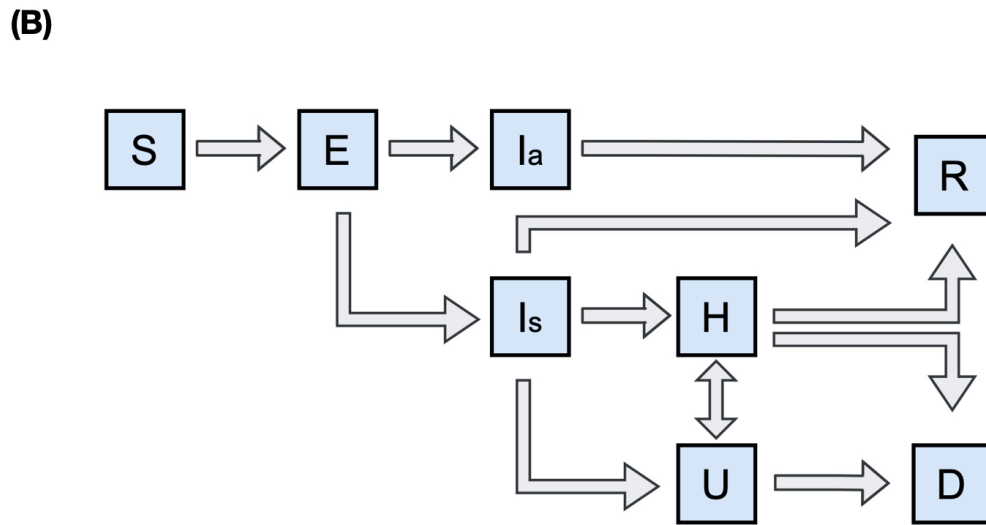

**Supplementary Figure 8. (A) Control loop scheme and (B) SEIIHURD compartmental model.** The notation  $k$  used in (A) defines the discrete sample time in the control algorithm.

## **Supplementary Tables**

**Supplementary Table 1. Key epidemiological parameters used in the SEIIHURD+ $\psi$  model without gains.** Estimates and values for the analysis of the SEIIHURD+ $\psi$  without gains with their search interval (when applicable) and respective estimates obtained according to best fit to data up to September 15, 2020 for Bahia. The parameters search intervals were informed by our previous literature mining (*I*).

| Parameter  | Description                                                    | Interval                                               | Fixed | Estimated (95% CI) |
|------------|----------------------------------------------------------------|--------------------------------------------------------|-------|--------------------|
| $\beta_0$  | Pre-intervention transmission rate                             | [0, 3]                                                 | -     | 2.13 (2.02-2.24)   |
| $\beta_1$  | Post-intervention transmission rate                            | [0, 3]                                                 | -     | 1.76 (1.67-1.85)   |
| $\beta_2$  | Post-intervention transmission rate                            | [0, 3]                                                 | -     | 1.13 (1.07-1.19)   |
| $\beta_3$  | Post-intervention transmission rate                            | [0, 3]                                                 | -     | 1.00 (0.95-1.05)   |
| $t_1$      | Time of transmission rate change                               | [March 26 <sup>th</sup> , May 17 <sup>th</sup> ]       | -     | March 26           |
| $t_2$      | Time of transmission rate change                               | [May 18 <sup>th</sup> , August 1 <sup>st</sup> ]       | -     | May 18             |
| $t_3$      | Time of transmission rate change                               | [August 1 <sup>st</sup> , September 15 <sup>th</sup> ] | -     | Aug 1              |
| $\delta$   | Asymptomatic/non-detected infectivity factor                   | [0,0.75]                                               | 0.31  | -                  |
| $p$        | Proportion of latent (E) that proceed to symptomatic infective | [0.13, 0.5]                                            | 0.2   | -                  |
| $\kappa$   | Mean exposed period                                            | [1/6, 1/3]                                             | 1/4   | -                  |
| $\gamma_a$ | Mean asymptomatic period                                       | [1/3.70, 1/3.24]                                       | 1/3.5 | -                  |
| $\gamma_s$ | Mean symptomatic period                                        | [1/5, 1/3]                                             | 1/4   | -                  |
| $h$        | Proportion of symptomatic needing hospitalization or ICU       | [0.05, 0.25]                                           | 0.06  | -                  |
| $1 - \xi$  | Proportion of symptomatic that proceed to ICU                  | [0.01, 0.5]                                            | 0.47  | -                  |
| $\gamma_H$ | Mean hospitalization (clinical beds) period                    | [1/12, 1/4]                                            | 0.18  | -                  |
| $\gamma_U$ | Mean ICU period                                                | [1/12, 1/3]                                            | 0.13  | -                  |
| $\mu_H$    | Death rate of hospitalized individuals                         | [0.1, 0.2]                                             | 0.15  | -                  |
| $\mu_U$    | Death rate of ICU individuals                                  | [0.4, 0.5]                                             | 0.4   | -                  |
| $\omega_H$ | Proportion of hospitalized that goes to ICU                    | [0.1, 0.3]                                             | 0.14  | -                  |
| $\omega_U$ | Proportion of ICU that goes to hospitalization                 | [0.1, 0.3]                                             | 0.29  | -                  |

**Supplementary Table 2. Parameter specifications for the optimizations procedure.**

| Parameter      | Search interval | Initial condition for the optimization problem |
|----------------|-----------------|------------------------------------------------|
| $g_1\beta$     | [0; 3]          | 1                                              |
| $g_2h$         | [0.05; 0.25]    | 0.06                                           |
| $g_3\xi$       | [0.5; 0.99]     | 0.53                                           |
| $g_4\mu_U$     | [0.4; 0.5]      | 0.4                                            |
| $g_5\gamma_U$  | [1/12; 1/3]     | 0.13                                           |
| $g_6\gamma_H$  | [1/12; 1/4]     | 0.18                                           |
| $g_7p$         | [0.13; 0.5]     | 0.2                                            |
| $g_8\omega_U$  | [0.1; 0.3]      | 0.29                                           |
| $g_9\omega_H$  | [0.1; 0.3]      | 0.14                                           |
| $g_{10}\mu_H$  | [0.1; 0.2]      | 0.15                                           |
| $g_{11}\delta$ | [0.01; 0.75]    | 0.31                                           |

**Supplementary Table 3. Control Input evaluation**

| <b>Control Input Value</b> | <b>Social Distancing Measure ID</b>                                 |
|----------------------------|---------------------------------------------------------------------|
| 0 %                        | Do nothing                                                          |
| 21.62 %                    | O1 = 0.333, O2 = 0.5, O3 = 0.25, O4 = 0.0, C1 = 0.214 and C2 = 0.00 |
| 36.71 %                    | O1 = 0.667, O2 = 1.0, O3 = 0.25, O4 = 0.0, C1 = 0.286 and C2 = 0.00 |
| 38.10 %                    | O1 = 0.667, O2 = 1.0, O3 = 0.25, O4 = 0.0, C1 = 0.428 and C2 = 0.00 |
| 39.00 %                    | O1 = 0.500, O2 = 1.0, O3 = 0.25, O4 = 0.0, C1 = 0.286 and C2 = 0.25 |
| 40.87 %                    | O1 = 0.667, O2 = 1.0, O3 = 0.25, O4 = 0.0, C1 = 0.286 and C2 = 0.25 |
| 41.50 %                    | O1 = 0.667, O2 = 1.0, O3 = 0.39, O4 = 0.0, C1 = 0.428 and C2 = 0.00 |
| 42.23 %                    | O1 = 0.667, O2 = 1.0, O3 = 0.39, O4 = 0.0, C1 = 0.456 and C2 = 0.01 |
| 43.25 %                    | O1 = 0.667, O2 = 1.0, O3 = 0.25, O4 = 0.0, C1 = 0.428 and C2 = 0.25 |
| 44.84 %                    | O1 = 0.333, O2 = 1.0, O3 = 1.00, O4 = 0.0, C1 = 0.357 and C2 = 0.00 |
| 45.90 %                    | O1 = 0.667, O2 = 1.0, O3 = 0.39, O4 = 0.0, C1 = 0.442 and C2 = 0.25 |
| 47.05 %                    | O1 = 0.667, O2 = 1.0, O3 = 0.39, O4 = 0.0, C1 = 0.511 and C2 = 0.25 |
| 49.21 %                    | O1 = 0.667, O2 = 1.0, O3 = 0.25, O4 = 0.5, C1 = 0.286 and C2 = 0.25 |
| 49.80 %                    | O1 = 0.333, O2 = 1.0, O3 = 1.00, O4 = 0.0, C1 = 0.571 and C2 = 0.08 |
| 51.59 %                    | O1 = 0.667, O2 = 1.0, O3 = 0.25, O4 = 0.5, C1 = 0.428 and C2 = 0.25 |
| 54.56 %                    | O1 = 0.333, O2 = 1.0, O3 = 1.00, O4 = 0.0, C1 = 0.857 and C2 = 0.08 |
| 54.69 %                    | O1 = 0.667, O2 = 1.0, O3 = 0.39, O4 = 0.5, C1 = 0.469 and C2 = 0.25 |
| 55.61 %                    | O1 = 0.667, O2 = 1.0, O3 = 0.39, O4 = 0.5, C1 = 0.525 and C2 = 0.25 |
| 57.94 %                    | O1 = 0.667, O2 = 1.0, O3 = 1.00, O4 = 0.0, C1 = 0.642 and C2 = 0.16 |
| 60.12 %                    | O1 = 0.667, O2 = 1.0, O3 = 1.00, O4 = 0.0, C1 = 0.857 and C2 = 0.08 |
| 62.69 %                    | O1 = 0.667, O2 = 1.0, O3 = 1.00, O4 = 0.0, C1 = 0.928 and C2 = 0.16 |

**Supplementary Table 4. Identified epidemiological parameters used in the SEIHURD+ $\psi$  model with gains. Identified parameter values coupled with its respective gain using the optimization method for a time window of 13 days, starting from March 6, 2020**

| Gains          | Time Window |        |        |        |        |        |        |        |        |        |        |        |        |
|----------------|-------------|--------|--------|--------|--------|--------|--------|--------|--------|--------|--------|--------|--------|
|                | 1           | 2      | 3      | 4      | 5      | 6      | 7      | 8      | 9      | 10     | 11     | 12     | 13     |
| $g_1\beta$     | 0.5486      | 1.7002 | 3.0000 | 2.2302 | 0.6286 | 0.9703 | 1.1252 | 1.2230 | 1.2148 | 0.6290 | 0.7149 | 2.5589 | 0.5730 |
| $g_2h$         | 0.0500      | 0.2500 | 0.2221 | 0.2500 | 0.2500 | 0.1947 | 0.1303 | 0.0568 | 0.0627 | 0.0500 | 0.0847 | 0.0500 | 0.0500 |
| $g_3\xi$       | 0.5000      | 0.6319 | 0.5000 | 0.7181 | 0.6143 | 0.8228 | 0.5000 | 0.5000 | 0.5000 | 0.5107 | 0.6052 | 0.5000 | 0.5000 |
| $g_4\mu_U$     | 0.5000      | 0.4000 | 0.4000 | 0.4000 | 0.5000 | 0.5000 | 0.5000 | 0.5000 | 0.5000 | 0.5000 | 0.4000 | 0.4984 | 0.5000 |
| $g_5\gamma_U$  | 0.3333      | 0.0833 | 0.1814 | 0.0932 | 0.0833 | 0.0833 | 0.1001 | 0.0875 | 0.0972 | 0.1631 | 0.1328 | 0.1232 | 0.1521 |
| $g_6\gamma_H$  | 0.2500      | 0.0833 | 0.2500 | 0.0833 | 0.1018 | 0.2500 | 0.1379 | 0.1028 | 0.1169 | 0.1902 | 0.2500 | 0.1923 | 0.1905 |
| $g_7p$         | 0.1300      | 0.2548 | 0.1750 | 0.2732 | 0.4033 | 0.5000 | 0.1969 | 0.2671 | 0.2062 | 0.1300 | 0.1300 | 0.1626 | 0.1796 |
| $g_8\omega_U$  | 0.1000      | 0.3000 | 0.3000 | 0.3000 | 0.1000 | 0.1000 | 0.1000 | 0.1000 | 0.1000 | 0.1000 | 0.3000 | 0.2004 | 0.1000 |
| $g_9\omega_H$  | 0.1000      | 0.3000 | 0.3000 | 0.3000 | 0.3000 | 0.3000 | 0.3000 | 0.3000 | 0.3000 | 0.3000 | 0.1000 | 0.1000 | 0.1891 |
| $g_{10}\mu_H$  | 0.1000      | 0.1000 | 0.2000 | 0.2000 | 0.2000 | 0.1020 | 0.2000 | 0.2000 | 0.2000 | 0.1000 | 0.1000 | 0.1000 | 0.1000 |
| $g_{11}\delta$ | 0.7500      | 0.7500 | 0.0779 | 0.0100 | 0.7500 | 0.7500 | 0.7500 | 0.0355 | 0.7500 | 0.7500 | 0.7500 | 0.0100 | 0.7500 |

**Supplementary Table 5. Key epidemiological parameters used in the SEIHURD model.**

| Parameter  | Description                                                                         |
|------------|-------------------------------------------------------------------------------------|
| $\beta$    | Transmission rate                                                                   |
| $t_i$      | Time of transmission rate change implicit on the Heaviside step function of $\beta$ |
| $\delta$   | Asymptomatic/non-detected infectivity factor                                        |
| $p$        | Proportion of latent (E) that proceed to symptomatic infective                      |
| $\kappa$   | Mean exposed period (days <sup>-1</sup> )                                           |
| $\gamma_a$ | Mean asymptomatic period (days <sup>-1</sup> )                                      |
| $\gamma_s$ | Mean symptomatic period (days <sup>-1</sup> )                                       |
| $h$        | Proportion of symptomatic needing hospitalization (clinical beds) or ICU            |
| $1 - \xi$  | Proportion of symptomatic that proceed to ICU                                       |
| $\gamma_H$ | Mean hospitalization (clinical beds) period (days <sup>-1</sup> )                   |
| $\gamma_U$ | Mean ICU period (days <sup>-1</sup> )                                               |
| $\mu_H$    | Death rate of hospitalized individuals                                              |
| $\mu_U$    | Death rate of ICU individuals                                                       |
| $\omega_H$ | Proportion of hospitalized that goes to ICU                                         |
| $\omega_U$ | Proportion of ICU that goes to hospitalization                                      |



**Supplementary Note 1**  
Parameter sensitivity analysis

## Parameter sensitivity analysis

We performed a sensitivity analysis to evaluate the effects of model parameters in the dynamics of  $I_a$ ,  $I_s$ ,  $U$ ,  $H$ ,  $R$ ,  $S$ ,  $E$  and  $D$  over time. By using an statistical variance-based method, described by Sobol (2001) (2), the sensitivity analysis of the SEIIHURD+ $\psi$  model considers the following parameter vector

$$\theta := (\kappa, \gamma_a, \gamma_s, \gamma_h, \gamma_u, \mu_u, \xi, h, \mu_h, \omega_h, \omega_u, \delta, p) \in \mathbb{R}^{13}, \quad (1)$$

assuming that its elements are uniformly distributed in proper intervals:

$$\begin{aligned} \beta &\sim \mathcal{U}(0, 3), & \gamma_H &\sim \mathcal{U}(1/12, 1/4), & \gamma_U &\sim \mathcal{U}(1/12, 1/3), \\ \mu_U &\sim \mathcal{U}(0.4, 0.5), & \xi &\sim \mathcal{U}(0.5, 0.99), & h &\sim \mathcal{U}(0.05, 0.99), \\ \mu_H &\sim \mathcal{U}(0.1, 0.2), & \omega_H &\sim \mathcal{U}(0.1, 0.3), & \omega_U &\sim \mathcal{U}(0.1, 0.3), \\ \delta &\sim \mathcal{U}(0, 1.5), & p &\sim \mathcal{U}(0.13, 0.5). \end{aligned} \quad (2)$$

To apply this method, we first generated sample values for the input factors shown in Eq. (1) by creating matrices  $A$  and  $B$ , each with size  $N \times n$ , where  $N$  is the number of samples and  $n = 13$  is the number of parameters being analyzed, given by

$$A = \begin{pmatrix} \theta_1^{(A1)} & \theta_2^{(A1)} & \dots & \theta_i^{(A1)} & \dots & \theta_n^{(A1)} \\ \theta_1^{(A2)} & \theta_2^{(A2)} & \dots & \theta_i^{(A2)} & \dots & \theta_n^{(A2)} \\ \vdots & \vdots & \dots & \vdots & \dots & \vdots \\ \theta_1^{(AN)} & \theta_2^{(AN)} & \dots & \theta_i^{(AN)} & \dots & \theta_n^{(AN)} \end{pmatrix} \quad (3)$$

and

$$B = \begin{pmatrix} \theta_1^{(B1)} & \theta_2^{(B1)} & \dots & \theta_i^{(B1)} & \dots & \theta_n^{(B1)} \\ \theta_1^{(B2)} & \theta_2^{(B2)} & \dots & \theta_i^{(B2)} & \dots & \theta_n^{(B2)} \\ \vdots & \vdots & \dots & \vdots & \dots & \vdots \\ \theta_1^{(BN)} & \theta_2^{(BN)} & \dots & \theta_i^{(BN)} & \dots & \theta_n^{(BN)} \end{pmatrix}. \quad (4)$$

We then create  $n$  matrices  $A_B^i$ , where column  $i$  comes from matrix  $B$  and all other  $n-1$  columns come from matrix  $A$ :

$$A_B^i = \begin{pmatrix} \theta_1^{(A1)} & \theta_2^{(A1)} & \dots & \theta_i^{(B1)} & \dots & \theta_n^{(A1)} \\ \theta_1^{(A2)} & \theta_2^{(A2)} & \dots & \theta_i^{(B2)} & \dots & \theta_n^{(A2)} \\ \vdots & \vdots & \dots & \vdots & \dots & \vdots \\ \theta_1^{(AN)} & \theta_2^{(AN)} & \dots & \theta_i^{(BN)} & \dots & \theta_n^{(AN)} \end{pmatrix}$$

In the matrices  $A$ ,  $B$  and  $A_B^i$ , each row represents a set of parameter to be used as an input for the model. Numerical simulations are performed, and the output of the sample matrices  $A$ ,  $B$  and  $A_B^i$  are stored as the vectors

$$Y_A = \begin{pmatrix} Y(A^{(A1)}) \\ Y(A^{(A2)}) \\ \vdots \\ Y(A^{(AN)}) \end{pmatrix}; \quad Y_B = \begin{pmatrix} Y(B^{(B1)}) \\ Y(B^{(B2)}) \\ \vdots \\ Y(B^{(BN)}) \end{pmatrix}; \quad Y_{A_B^i}. \quad (5)$$

where  $Y_A$ ,  $Y_B$  and  $Y_{A_B^i}$  are output vectors.

The final step involves the calculation of the sensitivity indices, using the samples generated during the sampling scheme. We computed the total effect indices, given by

$$S_{T_i} = 1 - \frac{Y_A \cdot Y_B - f^2}{Y_A \cdot Y_A - f^2} \quad (6)$$

where  $f$  is defined as

$$f := \frac{1}{N} \sum_{j=1}^N Y_A^{(j)}. \quad (7)$$

This index indicates the contribution of the parameter to the output of the model. The importance of each parameter  $i$  is proportional to the value of  $S_{T_i}$ , meaning that higher  $S_{T_i}$  leads to a higher contribution to the model output (3). Parameters with higher  $S_T$  need a more carefully calibration, as small error during the calibration can lead to larger errors to the predictions generated by the model. The total effect takes into account higher-order interactions among model variables; thus, correlation between variables can also be identified using this method. In addition, we also evaluated the influence of first-order effects, which do not consider interactions among variables, to the model output.

The numerical simulations were performed using the SALib library (4). The experiment was conducted generating  $N = 15,000$  parameter combinations, totaling 195,000 simulations of the model, and the result shows the evolution of the parameters according to  $S$ ,  $E$ ,  $I_a$ ,  $I_s$ ,  $U$ ,  $H$ ,  $R$  and  $D$  compartments.

The results for the sensitivity analysis of the SEIIHURD+ $\psi$  model confirm our previous findings of the sensitivity of the SEIIHURD model, where we showed that the transmission rate,  $\beta$ , and  $\delta$ , the factor that reduces the infectivity of asymptomatic/non-detected individuals, were among the most influential parameters to every model output during most of the evaluated periods (1). This result is recapitulated in every compartment throughout the course of the model dynamics studied herein (Supplementary Fig. 7). In the initial simulation period (up to day 20), the parameters that exert the most impact to the compartments related to severe disease ( $H$ ,  $U$ ) and fatalities ( $D$ ), after  $\beta$  and  $\delta$ , was  $h$  (the proportion of symptomatic needing hospitalization or ICU). In  $U$ , the parameter  $\xi$  also appears to play an important role in the dynamics of critical cases, which is expected as the parameter  $1 - \xi$  associates to the proportion of hospitalized symptomatic that proceed to ICU (Supplementary Fig. 7E,F,H). The parameter  $p$ , the proportion of latent ( $E$ ) that proceed to symptomatic infective, appears as an important factor governing the dynamics of individuals in  $I_s$ , specially at the initial simulation period and at later time points.

In line with our previous findings on the dynamics of the SEIIHURD model system (1), now expanded to the SEIIHURD+ $\psi$  framework, the sensitivity analysis conducted confirmed the importance of carefully considering the intervals of  $\beta$ ,  $\delta$ ,  $\xi$  and  $h$ , as these parameters represent important determinants of the dynamics of the model. Indeed, we have previously conducted an extensive literature mining of these key parameters to inform their ranges (Supplementary Table 1 and Ref. (1)).

**Supplementary Note 2**  
NMPC Algorithm

# NMPC Algorithm

---

## Finitely Parametrized NMPC for Social Distancing Guidelines

---

**Initialize:**  $N(0), S(0), E(0), I_a(0), I_s(0), H(0), U(0), R(0)$  and  $D(0)$ .

**Require:**  $Q, n_I, n_{\text{beds}}, n_{\text{ICU}}$

**Loop, every day:**

- Step (i): “Measure” the available contagion data  $(I(k), H(k), U(k), \psi(k)$  and  $D(k))$ ;
- Step (ii): **Loop every week:**
  - Step (a): **For each control sequence  $j$ :**
    - \* Step (1): Build the control vector  $\mathcal{U}_k$
    - \* Step (2): Explicitly simulate the future sequence of the SEIIHURD variables;
    - \* Step (3): Evaluate if constraints are respected. If they are not, end, else, compute the cost function  $J_{\text{NMPC}}(\cdot)$  value.
  - **end**
  - Step (b): Choose the optimal control value  $\mathcal{U}_k$  that corresponds to the smallest  $J(\cdot)$ .
  - Step (c): Increment  $k$ , i.e.  $k \leftarrow k + 1$ .
- **end**
- Step (iii): Apply the local control policy  $u(k)$ .
- Step (iv): Simulate the SEIIHURD+ $\psi$  model.
- Step (v): Increment  $k$ , i.e.  $k \leftarrow k + 1$ .

**end**

---

## Supplementary References

1. J. Oliveira, D. Jorge, R. Veiga, M. Rodrigues, M. Torquato, N. Silva, R. Fiaccone, L. Cardim, F. Pereira, C. Castro, A. Paiva, A. Amad, E. Lima, D. S Souza, S. Pinho, P. Ramos, R. Andrade, Mathematical modeling of COVID-19 in 14.8 million individuals in Bahia, Brazil, *Nature Communications* **12** (2021).
2. I. M. Sobol, Global sensitivity indices for nonlinear mathematical models and their Monte–Carlo estimates, *Mathematics and Computers in Simulation* **55**, 271 (2001).
3. A. Saltelli, M. Ratto, T. Andres, F. Campolongo, J. Cariboni, D. Gatelli, M. Saisana, S. Tarantola, *Global Sensitivity Analysis: The Primer* (John Wiley & Sons, 2008).
4. J. Herman, W. Usher, SALib: An open-source python library for sensitivity analysis, *The Journal of Open Source Software* **2** (2017).
